# Supplementary material for: A main chain biodegradable polyurethane with anti-protein adsorption and anti-bacterial adhesion performances
Source: Royal Society of Chemistry journal article supplement (doi:10.1039/d3sm01344h), 2023-11-27
Supplement: d3sm01344h1.pdf [file d3sm01344h1.pdf]

Electronic Supplementary Information

## The Main Chain Biodegradable Polyurethane with Anti-protein Adsorption and Anti-bacterial Adhesion Performances

Zhonglin Cao <sup>a,\*</sup>, Chunfeng Ma <sup>b</sup>, Li Xiang <sup>a,c</sup>, Linyan Cao <sup>d,\*</sup>

<sup>a</sup> College of Materials Science and Engineering, Guizhou Minzu University, Guiyang 550025, China

<sup>b</sup> Faculty of Materials Science and Engineering, South China University of Technology, Guangzhou 510640, PR China

<sup>c</sup> Key Laboratory of Polymer Processing Engineering (South China University of Technology), Ministry of Education

<sup>d</sup> College of Chemistry and Bioengineering, Hunan University of Science and Engineering, Yongzhou 425199, China

\*Corresponding author: zhonglincao@126.com (Z. Cao), cly917@mail.ustc.edu.cn (L. Cao).

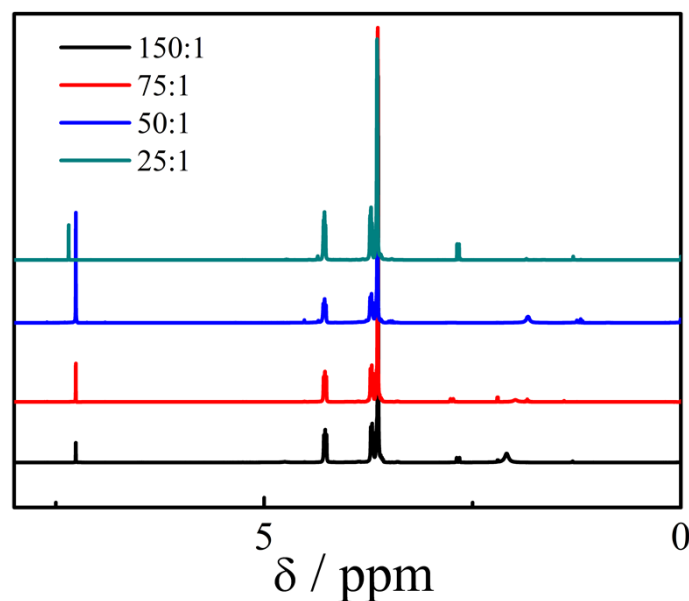

**Fig. S1.** <sup>1</sup>H NMR spectras of PEOC(OH)<sub>2</sub> with different monomer and initiator ratios.

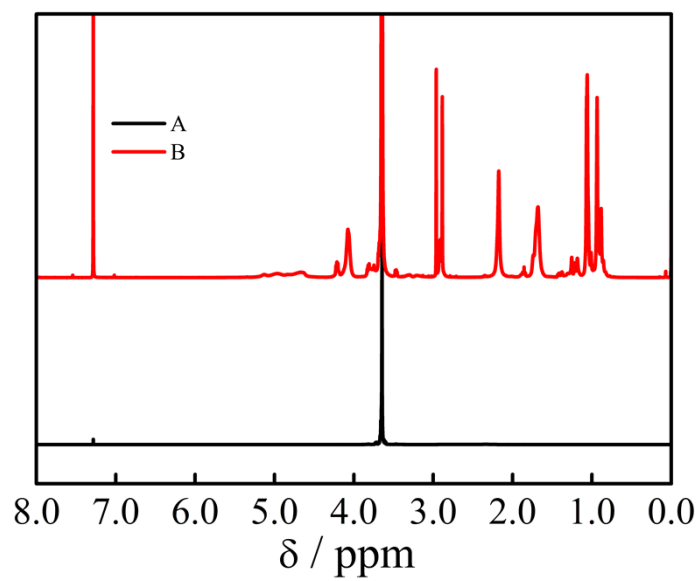

**Fig. S2.** <sup>1</sup>H NMR spectra of (A) PEG(OH)<sub>2</sub>, (B) PEG-PU.

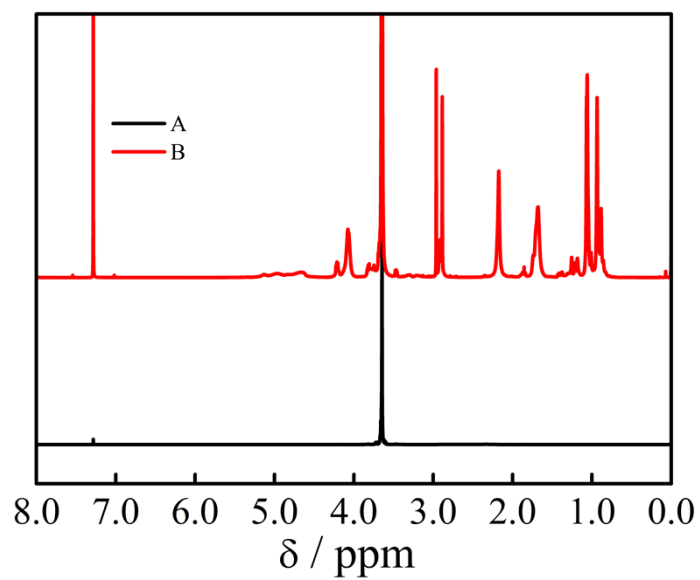

**Fig. S3.** <sup>1</sup>H NMR spectra of (A) PPG(OH)<sub>2</sub>, (B) PPG-PU.

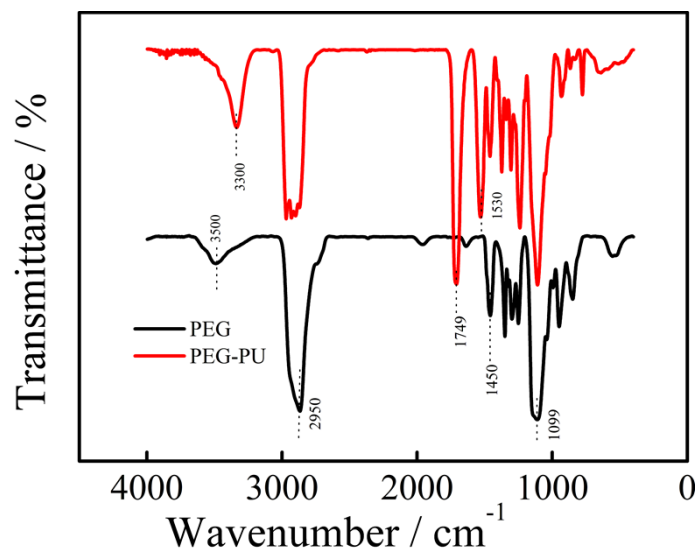

**Fig. S4.** FTIR spectra of PEG and PEG-PU. The whole spectra are shown from 4000 to 500  $\text{cm}^{-1}$ .

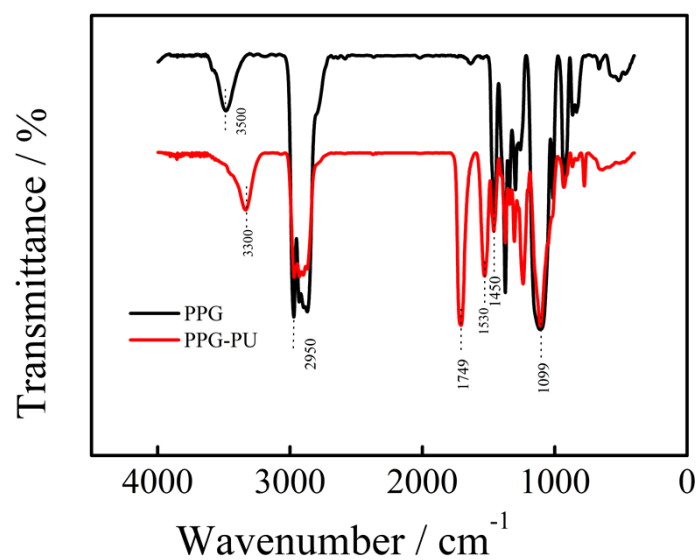

**Fig. S5.** FTIR spectra of PPG and PPG-PU. The whole spectra are shown from 4000 to 500  $\text{cm}^{-1}$ .

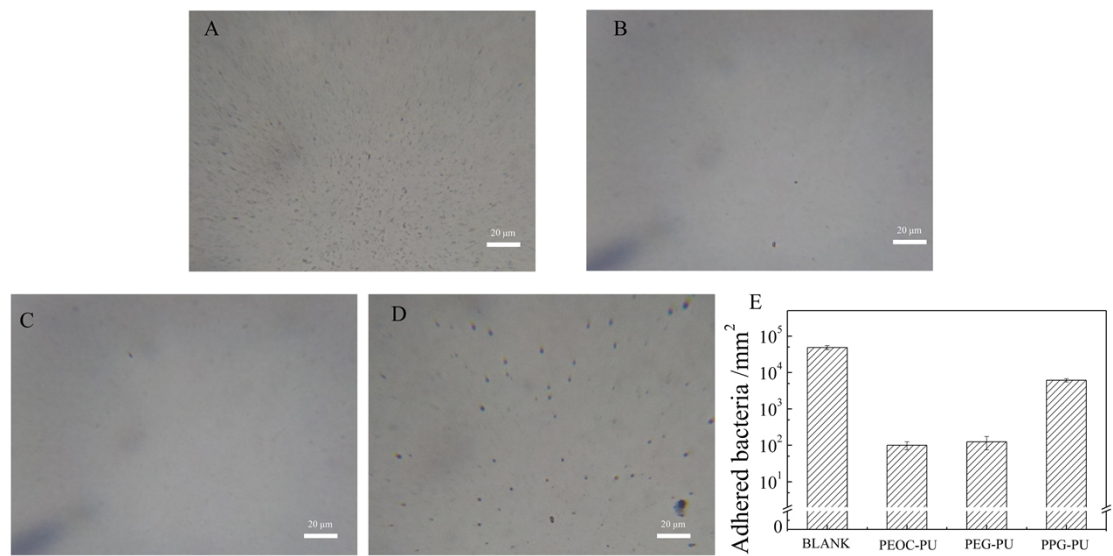

**Fig. S6.** Images of (A) BLANK, (B) PEG-PU, (C) PEOC-PU and (D) PPG-PU films immersion in *S. aureus* suspension in culture medium for 24 hours. Scale bar 20 μm; (E) adhered bacterial on PU films.
